# Supplementary material for: The Italian Osteopathic Practitioners Estimates and RAtes (OPERA) study: How osteopaths work
Source: PubMed Central journal article supplement (PMC7332305; doi:10.1371/journal.pone.0235539), 2020-07-02

# PLOS ONE

## The Italian Osteopathic Practitioners Estimates and RAtes (OPERA) study: how osteopaths work. --Manuscript Draft--

|                              |                                                                                                                                                                                                                                                                                                                                                                                                                                                                                                                                                                                                                                                                                                                                                                                                                                                                                                                                                                                                                                                                                                                                                                                                                                                                                                                                                                                                                                                                                                                                                                                                                                                                                                                                                                                                                                                                                                                                                                                                                                                                                                                                                                                                                                                                                                                                                                                                                                                                                                                                                                                                                                                                                                                                                                                                                                                                                                                                                                                                                                                                                                                                                                                                                                                                                                                                                                                                                                                                                                                                                                   |
|------------------------------|-------------------------------------------------------------------------------------------------------------------------------------------------------------------------------------------------------------------------------------------------------------------------------------------------------------------------------------------------------------------------------------------------------------------------------------------------------------------------------------------------------------------------------------------------------------------------------------------------------------------------------------------------------------------------------------------------------------------------------------------------------------------------------------------------------------------------------------------------------------------------------------------------------------------------------------------------------------------------------------------------------------------------------------------------------------------------------------------------------------------------------------------------------------------------------------------------------------------------------------------------------------------------------------------------------------------------------------------------------------------------------------------------------------------------------------------------------------------------------------------------------------------------------------------------------------------------------------------------------------------------------------------------------------------------------------------------------------------------------------------------------------------------------------------------------------------------------------------------------------------------------------------------------------------------------------------------------------------------------------------------------------------------------------------------------------------------------------------------------------------------------------------------------------------------------------------------------------------------------------------------------------------------------------------------------------------------------------------------------------------------------------------------------------------------------------------------------------------------------------------------------------------------------------------------------------------------------------------------------------------------------------------------------------------------------------------------------------------------------------------------------------------------------------------------------------------------------------------------------------------------------------------------------------------------------------------------------------------------------------------------------------------------------------------------------------------------------------------------------------------------------------------------------------------------------------------------------------------------------------------------------------------------------------------------------------------------------------------------------------------------------------------------------------------------------------------------------------------------------------------------------------------------------------------------------------------|
| <b>Manuscript Number:</b>    | PONE-D-19-35428                                                                                                                                                                                                                                                                                                                                                                                                                                                                                                                                                                                                                                                                                                                                                                                                                                                                                                                                                                                                                                                                                                                                                                                                                                                                                                                                                                                                                                                                                                                                                                                                                                                                                                                                                                                                                                                                                                                                                                                                                                                                                                                                                                                                                                                                                                                                                                                                                                                                                                                                                                                                                                                                                                                                                                                                                                                                                                                                                                                                                                                                                                                                                                                                                                                                                                                                                                                                                                                                                                                                                   |
| <b>Article Type:</b>         | Research Article                                                                                                                                                                                                                                                                                                                                                                                                                                                                                                                                                                                                                                                                                                                                                                                                                                                                                                                                                                                                                                                                                                                                                                                                                                                                                                                                                                                                                                                                                                                                                                                                                                                                                                                                                                                                                                                                                                                                                                                                                                                                                                                                                                                                                                                                                                                                                                                                                                                                                                                                                                                                                                                                                                                                                                                                                                                                                                                                                                                                                                                                                                                                                                                                                                                                                                                                                                                                                                                                                                                                                  |
| <b>Full Title:</b>           | The Italian Osteopathic Practitioners Estimates and RAtes (OPERA) study: how osteopaths work.                                                                                                                                                                                                                                                                                                                                                                                                                                                                                                                                                                                                                                                                                                                                                                                                                                                                                                                                                                                                                                                                                                                                                                                                                                                                                                                                                                                                                                                                                                                                                                                                                                                                                                                                                                                                                                                                                                                                                                                                                                                                                                                                                                                                                                                                                                                                                                                                                                                                                                                                                                                                                                                                                                                                                                                                                                                                                                                                                                                                                                                                                                                                                                                                                                                                                                                                                                                                                                                                     |
| <b>Short Title:</b>          | The Italian Osteopathic Practitioners Estimates and RAtes (OPERA) study: how osteopaths work.                                                                                                                                                                                                                                                                                                                                                                                                                                                                                                                                                                                                                                                                                                                                                                                                                                                                                                                                                                                                                                                                                                                                                                                                                                                                                                                                                                                                                                                                                                                                                                                                                                                                                                                                                                                                                                                                                                                                                                                                                                                                                                                                                                                                                                                                                                                                                                                                                                                                                                                                                                                                                                                                                                                                                                                                                                                                                                                                                                                                                                                                                                                                                                                                                                                                                                                                                                                                                                                                     |
| <b>Corresponding Author:</b> | Giacomo Consorti<br>Centre pour l'Etude la Recherche et la Diffusion Osteopathique<br>Rome, ITALY                                                                                                                                                                                                                                                                                                                                                                                                                                                                                                                                                                                                                                                                                                                                                                                                                                                                                                                                                                                                                                                                                                                                                                                                                                                                                                                                                                                                                                                                                                                                                                                                                                                                                                                                                                                                                                                                                                                                                                                                                                                                                                                                                                                                                                                                                                                                                                                                                                                                                                                                                                                                                                                                                                                                                                                                                                                                                                                                                                                                                                                                                                                                                                                                                                                                                                                                                                                                                                                                 |
| <b>Keywords:</b>             | osteopath; scope of practice; cross-sectional; osteopathic practice; OPERA; OPERA-IT                                                                                                                                                                                                                                                                                                                                                                                                                                                                                                                                                                                                                                                                                                                                                                                                                                                                                                                                                                                                                                                                                                                                                                                                                                                                                                                                                                                                                                                                                                                                                                                                                                                                                                                                                                                                                                                                                                                                                                                                                                                                                                                                                                                                                                                                                                                                                                                                                                                                                                                                                                                                                                                                                                                                                                                                                                                                                                                                                                                                                                                                                                                                                                                                                                                                                                                                                                                                                                                                              |
| <b>Abstract:</b>             | <p><b>Introduction:</b> The scope of practice of the osteopathic profession in Italy is underreported. The first part of the present study investigated the Italian osteopaths' profile, focusing on the socio-demographic information and geographical distribution together with the main characteristics of their education. The OPERA-IT study highlighted that the majority of respondents declared to work alone (58.4%), while the remaining declared to work in association with other professionals. Since teamwork and networking are recognized as fundamental aspects of healthcare, the present study aims to compare the osteopathic practise, diagnostic, and treatment modalities of osteopaths who work alone and osteopaths who work associated to other healthcare professionals to highlight possible differences. Moreover, patients' characteristics will be presented.</p> <p><b>Methods:</b> The OPERA-IT study population was chosen to provide a representative sample. A web campaign was set up to inform the Italian osteopathic professionals before the beginning of the study. The OPERA IT study used a validated questionnaire. The questionnaire was translated into Italian following the WHO recommendation. The questionnaire was composed of 57 items grouped in five sections, namely: socio-demographics, osteopathic education, and training, working profile, organisation, and management of the clinical practice and patient profile. The survey was delivered online through a dedicated platform.</p> <p><b>Results:</b> 4,816 individuals completed the survey. Osteopaths who work alone represented the majority of the sample (n=2814; 58.4%). Osteopaths who work with other professionals declared to collaborate mostly with physiotherapists (n=1121; 23.3%), physicians with speciality (n=1040; 21.6%), and other osteopaths (n=943; 19.6%). The two groups showed heterogeneous characteristics. Significant differences were observed in all the factors, namely: geographical distribution, age, gender, training, working contract and working place, patient per day and time for each patient, fees, and the average waiting period to book an appointment. The principal component analysis supported a ten-component model and explained 80.5% of the total variance. The analysis showed that osteopaths working alone have an increased probability (OR = 0.91; CI 95%: 0.88 - 0.94; p&lt;0.01) of using systemic diagnostic and treatment techniques and have distinct clinical features with higher probability (OR =0.92; 0.88 - 0.96; p&lt;0.01) of spending less time with patients, being paid less but treating a higher number of patients per week. The most represented patients' age groups were 41-64 years old (n=4452; 92.4%) and 21-40 years old (n=4291; 89.1%). Similarly, the most reported new patients age groups were 41-64 years old (n=4221; 87.7%) and 21-40 years old (n=3364; 69.9%). The most common presenting complaints were back pain, cervical pain, cervicobrachialgia, sciatica, shoulder pain, and headaches.</p> <p><b>Conclusions:</b> Osteopathic practice in Italy seems to be characterised by interprofessional collaboration, mostly with physiotherapists. Our results highlighted two different profiles in terms of sociodemographic characteristics and work modalities between osteopaths who work alone and those who work associated with other professionals. Although according to the respondents, people of all ages consult Italian</p> |

|                                                                                                                                                                                                                                                                                                                                                                                                                                                                                                                                                                                                                                                                                                                                                                                                                                                                                                                                                                                                                                                                                                                                                                                                                                                                                                                                                                    |                                                                                                                                                                                                                                                                                                            |
|--------------------------------------------------------------------------------------------------------------------------------------------------------------------------------------------------------------------------------------------------------------------------------------------------------------------------------------------------------------------------------------------------------------------------------------------------------------------------------------------------------------------------------------------------------------------------------------------------------------------------------------------------------------------------------------------------------------------------------------------------------------------------------------------------------------------------------------------------------------------------------------------------------------------------------------------------------------------------------------------------------------------------------------------------------------------------------------------------------------------------------------------------------------------------------------------------------------------------------------------------------------------------------------------------------------------------------------------------------------------|------------------------------------------------------------------------------------------------------------------------------------------------------------------------------------------------------------------------------------------------------------------------------------------------------------|
|                                                                                                                                                                                                                                                                                                                                                                                                                                                                                                                                                                                                                                                                                                                                                                                                                                                                                                                                                                                                                                                                                                                                                                                                                                                                                                                                                                    | osteopaths, the majority of patients are adults. Most of them have been referred to osteopathy by other patients or acquaintances. Patients seek osteopathic care mostly for musculoskeletal related complaints.                                                                                           |
| <b>Order of Authors:</b>                                                                                                                                                                                                                                                                                                                                                                                                                                                                                                                                                                                                                                                                                                                                                                                                                                                                                                                                                                                                                                                                                                                                                                                                                                                                                                                                           | Francesco Cerritelli                                                                                                                                                                                                                                                                                       |
|                                                                                                                                                                                                                                                                                                                                                                                                                                                                                                                                                                                                                                                                                                                                                                                                                                                                                                                                                                                                                                                                                                                                                                                                                                                                                                                                                                    | Giacomo Consorti                                                                                                                                                                                                                                                                                           |
|                                                                                                                                                                                                                                                                                                                                                                                                                                                                                                                                                                                                                                                                                                                                                                                                                                                                                                                                                                                                                                                                                                                                                                                                                                                                                                                                                                    | Patrick LS van Dun                                                                                                                                                                                                                                                                                         |
|                                                                                                                                                                                                                                                                                                                                                                                                                                                                                                                                                                                                                                                                                                                                                                                                                                                                                                                                                                                                                                                                                                                                                                                                                                                                                                                                                                    | Jorge E Esteves                                                                                                                                                                                                                                                                                            |
|                                                                                                                                                                                                                                                                                                                                                                                                                                                                                                                                                                                                                                                                                                                                                                                                                                                                                                                                                                                                                                                                                                                                                                                                                                                                                                                                                                    | Paola Sciomachen                                                                                                                                                                                                                                                                                           |
|                                                                                                                                                                                                                                                                                                                                                                                                                                                                                                                                                                                                                                                                                                                                                                                                                                                                                                                                                                                                                                                                                                                                                                                                                                                                                                                                                                    | Massimo Valente                                                                                                                                                                                                                                                                                            |
|                                                                                                                                                                                                                                                                                                                                                                                                                                                                                                                                                                                                                                                                                                                                                                                                                                                                                                                                                                                                                                                                                                                                                                                                                                                                                                                                                                    | Eleonora Lacorte                                                                                                                                                                                                                                                                                           |
|                                                                                                                                                                                                                                                                                                                                                                                                                                                                                                                                                                                                                                                                                                                                                                                                                                                                                                                                                                                                                                                                                                                                                                                                                                                                                                                                                                    | Nicola Vanacore                                                                                                                                                                                                                                                                                            |
| <b>Additional Information:</b>                                                                                                                                                                                                                                                                                                                                                                                                                                                                                                                                                                                                                                                                                                                                                                                                                                                                                                                                                                                                                                                                                                                                                                                                                                                                                                                                     |                                                                                                                                                                                                                                                                                                            |
| <b>Question</b>                                                                                                                                                                                                                                                                                                                                                                                                                                                                                                                                                                                                                                                                                                                                                                                                                                                                                                                                                                                                                                                                                                                                                                                                                                                                                                                                                    | <b>Response</b>                                                                                                                                                                                                                                                                                            |
| <p><b>Financial Disclosure</b></p> <p>Enter a financial disclosure statement that describes the sources of funding for the work included in this submission. Review the <a href="#">submission guidelines</a> for detailed requirements. View published research articles from <a href="#">PLOS ONE</a> for specific examples.</p> <p>This statement is required for submission and <b>will appear in the published article</b> if the submission is accepted. Please make sure it is accurate.</p> <p><b>Unfunded studies</b><br/>Enter: <i>The author(s) received no specific funding for this work.</i></p> <p><b>Funded studies</b><br/>Enter a statement with the following details:</p> <ul style="list-style-type: none"> <li>• Initials of the authors who received each award</li> <li>• Grant numbers awarded to each author</li> <li>• The full name of each funder</li> <li>• URL of each funder website</li> <li>• Did the sponsors or funders play any role in the study design, data collection and analysis, decision to publish, or preparation of the manuscript?</li> <li>• <b>NO</b> - Include this sentence at the end of your statement: <i>The funders had no role in study design, data collection and analysis, decision to publish, or preparation of the manuscript.</i></li> <li>• <b>YES</b> - Specify the role(s) played.</li> </ul> | <p>FC received 1 grant from Registro degli Osteopati d'Italia <a href="https://www.registro-osteopati-italia.com/">https://www.registro-osteopati-italia.com/</a></p> <p>The funders had no role in study design, data collection and analysis, decision to publish, or preparation of the manuscript.</p> |

\* typeset

### Competing Interests

Use the instructions below to enter a competing interest statement for this submission. On behalf of all authors, disclose any [competing interests](#) that could be perceived to bias this work—acknowledging all financial support and any other relevant financial or non-financial competing interests.

This statement **will appear in the published article** if the submission is accepted. Please make sure it is accurate. View published research articles from [PLOS ONE](#) for specific examples.

#### NO authors have competing interests

Enter: *The authors have declared that no competing interests exist.*

#### Authors with competing interests

Enter competing interest details beginning with this statement:

*I have read the journal's policy and the authors of this manuscript have the following competing interests: [insert competing interests here]*

\* typeset

### Ethics Statement

Enter an ethics statement for this submission. This statement is required if the study involved:

- Human participants
- Human specimens or tissue
- Vertebrate animals or cephalopods
- Vertebrate embryos or tissues
- Field research

Write "N/A" if the submission does not require an ethics statement.

The authors have declared that no competing interests exist.

Participants were requested to read and understand all the information about the study and to give their informed consent by starting the survey as clearly stated in the survey presentation page. The study received the approval of the Institutional Review Board of the Foundation COME Collaboration (12/2016).

General guidance is provided below. Consult the [submission guidelines](#) for detailed instructions. **Make sure that all information entered here is included in the Methods section of the manuscript.**

#### Format for specific study types

##### Human Subject Research (involving human participants and/or tissue)

- Give the name of the institutional review board or ethics committee that approved the study
- Include the approval number and/or a statement indicating approval of this research
- Indicate the form of consent obtained (written/oral) or the reason that consent was not obtained (e.g. the data were analyzed anonymously)

##### Animal Research (involving vertebrate animals, embryos or tissues)

- Provide the name of the Institutional Animal Care and Use Committee (IACUC) or other relevant ethics board that reviewed the study protocol, and indicate whether they approved this research or granted a formal waiver of ethical approval
- Include an approval number if one was obtained
- If the study involved *non-human primates*, add *additional details* about animal welfare and steps taken to ameliorate suffering
- If anesthesia, euthanasia, or any kind of animal sacrifice is part of the study, include briefly which substances and/or methods were applied

##### Field Research

Include the following details if this study involves the collection of plant, animal, or other materials from a natural setting:

- Field permit number
- Name of the institution or relevant body that granted permission

##### Data Availability

Authors are required to make all data

No - some restrictions will apply

underlying the findings described fully available, without restriction, and from the time of publication. PLOS allows rare exceptions to address legal and ethical concerns. See the [PLOS Data Policy](#) and [FAQ](#) for detailed information.

A Data Availability Statement describing where the data can be found is required at submission. Your answers to this question constitute the Data Availability Statement and **will be published in the article**, if accepted.

**Important:** Stating 'data available on request from the author' is not sufficient. If your data are only available upon request, select 'No' for the first question and explain your exceptional situation in the text box.

Do the authors confirm that all data underlying the findings described in their manuscript are fully available without restriction?

**Describe where the data may be found in full sentences. If you are copying our sample text, replace any instances of XXX with the appropriate details.**

- If the data are **held or will be held in a public repository**, include URLs, accession numbers or DOIs. If this information will only be available after acceptance, indicate this by ticking the box below. For example: *All XXX files are available from the XXX database (accession number(s) XXX, XXX).*
- If the data are all contained **within the manuscript and/or Supporting Information files**, enter the following: *All relevant data are within the manuscript and its Supporting Information files.*
- If neither of these applies but you are able to provide **details of access elsewhere**, with or without limitations, please do so. For example:

*Data cannot be shared publicly because of [XXX]. Data are available from the*

Data represent third party data that cannot be made publicly available due to ethical and legal restrictions. Ethically, public availability would compromise participants confidentiality as the minimal dataset would include information on participants age, gender, workplace. Due to our permission as given by the Registro Osteopati d'Italia we are restricted not to disclose data to a third party. However, data can be requested by contacting [irb@comecollaboration.org](mailto:irb@comecollaboration.org).

*XXX Institutional Data Access / Ethics Committee (contact via XXX) for researchers who meet the criteria for access to confidential data.*

*The data underlying the results presented in the study are available from (include the name of the third party and contact information or URL).*

- This text is appropriate if the data are owned by a third party and authors do not have permission to share the data.

\* typeset

Additional data availability information:

1 **The Italian Osteopathic Practitioners Estimates and RAtes (OPERA) study: how**  
2 **osteopaths work.**

3

4 Francesco Cerritelli<sup>1</sup>, Giacomo Consorti<sup>1,2,6</sup>, Patrick L. S. van Dun<sup>3</sup>, Jorge E. Esteves<sup>4,5</sup>, Paola  
5 Sciomachen<sup>6</sup>, Massimo Valente<sup>1</sup>, Eleonora Lacorte<sup>7</sup>, Nicola Vanacore<sup>7</sup>, OPERA-IT Group

6

7 **Affiliations**

8 1. Clinical-based Human Research Department, Research Division, COME  
9 Collaboration, Pescara, Italy

10 2. Research Department of the Centre pour l'Etude, la Recherche et la Diffusion  
11 Osteopathiques (C.E.R.D.O.), Rome, Italy

12 3. Belgium National Centre, Foundation COME Collaboration, Mechelen, Belgium

13 4. Gulf National Centre, Foundation COME Collaboration, Riyadh, KSA,

14 5. University College of Osteopathy, London, United Kingdom

15 6. Registro degli Osteopati d'Italia, Milan, Italy

16 7. National Institute of Health, Rome, Italy

17

18 **Address for corrispondence**

19 Giacomo Consorti

20 Largo Ceresio, 4

21 22100 Como (CO)

22 Italy

23 ph: +39 3405204077

24 email: [giacomo.consorti@gmail.com](mailto:giacomo.consorti@gmail.com)

25

26 **Abstract**

27 **Introduction:** The scope of practice of the osteopathic profession in Italy is underreported.  
28 The first part of the present study investigated the Italian osteopaths' profile, focusing on the  
29 socio-demographic information and geographical distribution together with the main  
30 characteristics of their education. The OPERA-IT study highlighted that the majority of  
31 respondents declared to work alone (58.4%), while the remaining declared to work in  
32 association with other professionals. Since teamwork and networking are recognized as  
33 fundamental aspects of healthcare, the present study aims to compare the osteopathic practise,  
34 diagnostic, and treatment modalities of osteopaths who work alone and osteopaths who work  
35 associated to other healthcare professionals to highlight possible differences. Moreover,  
36 patients' characteristics will be presented.

37 **Methods:** The OPERA-IT study population was chosen to provide a representative sample.  
38 A web campaign was set up to inform the Italian osteopathic professionals before the  
39 beginning of the study. The OPERA IT study used a validated questionnaire. The  
40 questionnaire was translated into Italian following the WHO recommendation. The  
41 questionnaire was composed of 57 items grouped in five sections, namely: socio-  
42 demographics, osteopathic education, and training, working profile, organisation, and  
43 management of the clinical practice and patient profile. The survey was delivered online  
44 through a dedicated platform.

45 **Results:** 4,816 individuals completed the survey. Osteopaths who work alone represented the  
46 majority of the sample (n=2814; 58.4%). Osteopaths who work with other professionals  
47 declared to collaborate mostly with physiotherapists (n=1121; 23.3%), physicians with  
48 speciality (n=1040; 21.6%), and other osteopaths (n=943; 19.6%). The two groups showed  
49 heterogeneous characteristics. Significant differences were observed in all the factors,  
50 namely: geographical distribution, age, gender, training, working contract and working place,



51 patient per day and time for each patient, fees, and the average waiting period to book an  
52 appointment. The principal component analysis supported a ten-component model and  
53 explained 80.5% of the total variance. The analysis showed that osteopaths working alone  
54 have an increased probability (OR = 0.91; CI 95%: 0.88 - 0.94; p<0.01) of using systemic  
55 diagnostic and treatment techniques and have distinct clinical features with higher probability  
56 (OR =0.92; 0.88 - 0.96; p<0.01) of spending less time with patients, being paid less but  
57 treating a higher number of patients per week. The most represented patients' age groups  
58 were 41-64 years old (n=4452; 92.4%) and 21-40 years old (n=4291; 89.1%). Similarly, the  
59 most reported new patients age groups were 41-64 years old (n=4221; 87.7%) and 21-40  
60 years old (n=3364; 69.9%). The most common presenting complaints were back pain,  
61 cervical pain, cervicobrachialgia, sciatica, shoulder pain, and headaches.

62 **Conclusions:** Osteopathic practice in Italy seems to be characterised by interprofessional  
63 collaboration, mostly with physiotherapists. Our results highlighted two different profiles in  
64 terms of sociodemographic characteristics and work modalities between osteopaths who work  
65 alone and those who work associated with other professionals. Although according to the  
66 respondents, people of all ages consult Italian osteopaths, the majority of patients are adults.  
67 Most of them have been referred to osteopathy by other patients or acquaintances. Patients  
68 seek osteopathic care mostly for musculoskeletal related complaints.

69

## 70 **Introduction**

71 Osteopathy is a growing health profession in Italy. In a recent national opinion survey  
72 conducted on a sample of 800 participants  by Eumetra Monterosa (1), it has been reported  
73 that over 10 million Italians received osteopathic care, particularly for musculoskeletal  
74 related problems (70% of the reported reasons of the consultation). 90% of the sample in the

75 study ~~declared to be~~ satisfied with the osteopathic care provided (1). The first part of the  
76 present study investigated the Italian osteopaths' profile, focusing on the socio-demographic  
77 information and geographical distribution together with the main characteristics of their  
78 education (2). The scope of practice of the osteopathic profession in Italy is, however,  
79 significantly underreported. Therefore, other health care professionals and the general public  
80 may not be aware of the nature of the osteopathic practice, including commonly treated  
81 clinical conditions, therapeutic interventions, and patients' characteristics. This is particularly  
82 important because the osteopathic care provided may vary amongst individual clinicians and  
83 between countries (3–9). For example, American osteopathic physicians have a scope of  
84 practice equivalent to medical practitioners (10). In Europe, Denmark, Finland, France,  
85 Iceland, Italy, Liechtenstein, Malta, Portugal, Switzerland, Turkey, and the UK have  
86 regulated osteopathy (11). In contrast to their US counterparts - i.e., 'osteopathic physicians',  
87 European osteopaths have limited practice rights, and they are called 'osteopaths' (10). In  
88 Italy, with the approval of the law 3/2018, osteopathy has been recognized as a healthcare  
89 profession (12). However, the regulation process is still ongoing, and despite the recent  
90 publication of the Core Competence of the Italian Osteopaths (13), the proper scope of  
91 practice of Italian osteopaths has not yet been published.

92 Van Dun et al. (6) were the first authors to profile the osteopathic practitioners in countries  
93 without statutory regulation in osteopathy using the Benelux Osteosurvey tool. The  
94 Osteopathic Practitioners Estimates and RAtes (OPERA) project was developed starting from  
95 the Osteosurvey tool. OPERA is a European-based census aimed to profile the osteopathic  
96 profession across Europe (2). Arguably, it is a relevant tool for all the stakeholders interested  
97 in obtaining up-to-date and reliable information regarding the geo-distribution, prevalence,  
98 incidence, and profile of osteopaths and their patients in Europe. The OPERA study has been  
99 initially conducted in Italy (2) and is currently being carried out in Spain, Andorra, Belgium,

100 Luxembourg, and Portugal. Several studies investigated the primary reasons for consultation  
101 and the characteristics of patients receiving osteopathic care (5,8,14–20). However, none of  
102 these studies was carried out on the Italian population.

103 The aim of the OPERA Italy (OPERA-IT) study was to profile osteopathic practice in Italy  
104 by surveying osteopaths across the country regarding socio-demographic information (2),  
105 their practice and patients' characteristics, presenting symptoms and clinical problems, use of  
106 diagnostic and treatment modalities. The OPERA-IT study highlighted that the majority of  
107 respondents ~~declared to work~~ alone (58.4%), while the remaining declared to work in  
108 association with other professionals. Since teamwork and networking are recognized as  
109 fundamental aspects of healthcare (21), the present study aims to compare the osteopathic  
110 practise, diagnostic, and treatment modalities of osteopaths who work alone and osteopaths  
111 who work associated to other healthcare professionals to highlight possible differences.  
112 Moreover, patients' characteristics will be presented.

## 114 **Methods**

115 The SURvey Reporting GuidelinE (SURGE) (22) was used as a reporting guideline for this  
116 article.

## 117 **Population**

118 The OPERA-IT study population was chosen to provide a representative sample. For that  
119 purpose, the recruitment strategy followed specific criteria and was as inclusive as possible  
120 without compromising the representativeness of the sample. Hence the recruitment was  
121 aimed to obtain the highest possible participation among those who fulfilled the following  
122 inclusion criteria: older than 18 years old, the successful completion of any training leading  
123 to a Diploma in Osteopathy (DO) or equivalent (23), and the participants had to be practising

124 as an osteopath. Participation or successful completion of any training courses on single  
125 techniques and osteopathic approaches, which did not lead to a DO or equivalent title (23),  
126 was not considered sufficient to be included in the study. Therefore individuals matching this  
127 profile were excluded. Exclusion criteria were set to prevent non-osteopaths who attended  
128 short and non-degree/professional awarding courses in, e.g., craniosacral technique or spinal  
129 manipulation to participate and to lower the representativeness of the sample. OPERA-IT  
130 used an online survey; therefore professionals with no access to the online platform were  
131 excluded. Individuals who could not understand and respond in Italian and individuals with  
132 physical or mental impairments that precluded participation in the online survey were also  
133 excluded. Participants were requested to read and understand all the information about the  
134 study and to give their informed consent by starting the survey as clearly stated in the survey  
135 presentation page. The study received the approval of the Institutional Review Board of the  
136 Foundation COME Collaboration (12/2016).

137

## 138 **Recruitment**

139 A website for promoting OPERA IT was created. A web campaign was set up to inform the  
140 Italian osteopathic professionals before the beginning of the study. The campaign was  
141 structured as a combined social media and newsletter strategy. The largest osteopathic  
142 national voluntary registering body (ROI) took part in the promotion by sending a newsletter  
143 to all its current members. At the time in which the study was carried out, ROI included  
144 approximately 2,500 members. Since it was estimated that the ROI members alone were not  
145 representative of the Italian osteopaths population, an additional e-campaign was established  
146 to reach the osteopathic education institutions, the other voluntary registering bodies and  
147 professional associations and the known osteopathic internet providers/specialised websites

148 (i.e., tuttosteopatia.it) asking them to advertise the study to all of their members through the  
149 official OPERA IT e-flyer. In addition to the e-flyer, all the participating osteopathic  
150 education institutions were provided with a physical flyer and other advertising material to be  
151 displayed at their location. Furthermore, a manual based search on white-pages was  
152 conducted to identify other sources of information. The promotion strategy was carried in  
153 twelve steps. Each step consisted of the dispatch of the e-flyer to all the different mailing  
154 lists. The time interval for the promotion strategy, recruitment, and data collection were five-  
155 months. All participants, upon the completion of the survey, received an invitation containing  
156 the credential to attend free continuous professional development (CPD) webinars on a  
157 dedicated online platform. Participants were able to log in at any time during the study period  
158 and follow the pre-recorded webinars

159

## 160 **Survey tool**

161 The OPERA IT study used a validated questionnaire (6). The questionnaire was translated  
162 into Italian following the WHO recommendation. Therefore, a forward-backwards translation  
163 was performed by two bilingual English-Italian translators with experience in the field of  
164 demographic health research. The questionnaire is composed of 57 items grouped in five  
165 sections, namely: socio-demographics, osteopathic education, and training, working profile,  
166 organisation, and management of the clinical practice and patient profile. A pilot survey was  
167 delivered to twenty Italian-speaking osteopaths. The pilot aimed to gather information about  
168 the degree of comprehensibility of the items. For that purpose face-to-face interviews were  
169 conducted by the research team and the survey was modified in accordance with the  
170 suggestions of the participants. The first OPERA IT publication reported the results of the

171 first three sections of the survey (2). The present study will report the results from the  
172 remaining two sections.

173

174 The OPERA survey online platform, the symmetric keys data encryption, and the certified  
175 data centre were the same used for the first part of the present study (2). Therefore, all of the  
176 gathered information was processed and hosted following data protection regulations, the  
177 answers were anonymised, and the IP addresses were not accessible to the research team. The  
178 system automatically managed the link between the StudyID and the email address of  
179 respondents so that double response was not allowed. Only OPERA research personnel had  
180 access to the complete, anonymised dataset.

181

## 182 **Privacy**

183 The anonymity and privacy of data were respected following the European directive  
184 2002/58/CE of the European Parliament. Gathered data will be stored for 5 years to allow  
185 benchmarking and further analyses.

## 186 **Information guidelines**

187 ~~In this study will be reported participants answers regarding their practice and patients'~~  
188 ~~characteristics, presenting symptoms and clinical problems, use of diagnostic and treatment~~  
189 ~~modalities~~

## 190 **Statistical analysis**

191 Data were analysed using mean, median, mode, point estimates, range, standard deviation,  
192 and 95% confidence interval. For dichotomous measures, relative risk was used. Statistical  
193 analyses were based on a univariate and multivariate approach. R statistical programme (v.

194 3.1.3) was used to perform statistical analysis. A value of alpha less than 0.05 was considered  
195 as significant.

196

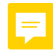

### 197 **Principal-Component Analysis (PCA) and logistic analysis**

198 The examination of the data indicated that items had non-normal distributions, which is  
199 common for categorical data. Categorical PCA, a form of PCA specifically geared to discrete  
200 ordinal values, was run using R Statistical program (v3.5). The fundamental idea of PCA is to  
201 examine the matrix of item correlations to reduce the information into a smaller set of  
202 components. These components can form the basis for hypotheses about latent factors. In the  
203 presence of high intercorrelation, items are assumed to be measuring the same latent  
204 component. All items are assumed to load onto all components.

205 Component eigenvalues represent the relative share of total variance accounted for by that  
206 component and can, therefore, be used to select the number of components. We selected  
207 components being greater than 1, in order to determine the dimensions underlying the pattern  
208 of interrelationships among the scores considered. Thus, reducing the number of the original  
209 variables and increasing the interpretability of the summary components. To aid  
210 interpretability, the component matrix was rotated using Promax oblique rotation, which  
211 assumes that components are correlated. Rotations are a change in the coordinate of the  
212 component solution that makes the pattern of loadings more pronounced and, therefore  
213 clearer. Components loadings, which are the correlation coefficients between the items and  
214 the identified components, are reported. The square of component loadings represents the  
215 amount of variance in the item explained by the component.

216 **The resulting components of PCA were used as independent variables in a logistic regression**  
217 model with the dependent variable “alone” yes/no. The interpretation of the meaning of each  
218 factor was defined in a collaborative way among the authors. In general, all items were

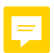

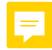

219 categorised into (1) musculoskeletal; (2) systemic; (3) clinical. Each category was  
 220 characterized by a number of affine elements (clusters). The systemic category included both  
 221 diagnostic items, as the visceral, cranium, and fascial diagnostic techniques, and treatment  
 222 items, as neurovisceral and neurolymphatic reflex techniques and fascial techniques. The  
 223 musculoskeletal category included as well both diagnostic and treatment items, as palpation  
 224 of the position of the anatomical structures, and trigger points treatment. The “clinical”  
 225 category was characterized by items which describe the clinical practice of the osteopathic  
 226 professional, such as the duration and the fees of the first and follow-up clinical encounters,  
 227 the average waiting period to schedule an appointment or the number of patient per week  
 228 encountered by the practitioner.

229

230 **Results**

231 4,816 individuals completed the survey. 196 questionnaires, corresponding to a 4% attrition  
 232 rate, were left uncompleted. Composition and geographical distribution of the whole sample  
 233 are reported by Cerritelli et al. (2). Osteopaths who work alone represented the majority of  
 234 the sample (n=2814; 58.4%). Osteopaths who work with other professionals declared to  
 235 collaborate mostly with physiotherapists (n=1121; 23.3%), physicians with speciality  
 236 (n=1040; 21.6%), and other osteopaths (n=943; 19.6%). A comprehensive description of  
 237 osteopaths' collaborations is available in Table 1.

238

|                                 | N    | %    |
|---------------------------------|------|------|
| Alone                           | 2814 | 58.4 |
| Associated                      | 2002 | 41.6 |
| <i>osteopath</i>                | 943  | 19.6 |
| <i>GP</i>                       | 390  | 8.1  |
| <i>physiotherapist</i>          | 1121 | 23.3 |
| <i>occupational therapist</i>   | 74   | 1.5  |
| <i>psychologist</i>             | 746  | 15.5 |
| <i>speech therapist</i>         | 317  | 6.6  |
| <i>dietician</i>                | 671  | 13.9 |
| <i>dentistry</i>                | 433  | 9.0  |
| <i>massage therapist</i>        | 446  | 9.3  |
| <i>physician with specialty</i> | 1040 | 21.6 |
| <i>optometrist</i>              | 162  | 3.4  |



|              |     |      |
|--------------|-----|------|
| <i>other</i> | 493 | 10.2 |
|--------------|-----|------|

Table 1. Working collaborations of osteopaths

### 241 **Comparison between osteopaths who work alone and associated**

242 The two groups showed heterogeneous characteristics. Significative differences were  
243 **observed in all the factors**, namely: geographical distribution, age, gender, training, working  
244 contract and working place, patient per day and time for each patient, fees, and the average  
245 waiting period to book an appointment. In particular, referring to the geographical  
246 distribution, osteopaths who work in the macro-region "centre" have the highest odd to work  
247 associated with other professionals (**OR** = 1.37). Younger osteopaths (20-29 years old) have  
248 the highest odd to work associated compared to other age groups (OR of other age groups  
249 compared to the 20-29 age group < 1). Female osteopaths have 59% more likely to work  
250 associated compared to male ones (OR = 1.59). Osteopaths who graduated through a full-  
251 time curriculum (T1) have a higher chance of working associated compared to those from a  
252 part-time one (T2) (OR for T2 compared to T1 = 0.71). Osteopaths who work as self-  
253 employed in their clinic have the highest probability of working in association with other  
254 professionals (OR. 1.23). Osteopaths who work in a university have a 77% increased  
255 probability of working associated than osteopaths who work in other places (OR = 1.77).  
256 Osteopaths who have 11 to 15 clinical encounters per day are more likely to work in  
257 association than others (OR = 1.50) as well those whose clinical encounter lasts 46-60  
258 minutes (OR = 2. **4**). Osteopaths who charge between 51 and 60 euros per both first  
259 consultation and follow-ups have more than the double probability to work in association  
260 than others (OR = 2.37; OR = 2.94). Osteopaths who have a waiting period for the booking in  
261 between 2 and 3 weeks have almost a probability almost three times higher to work in  
262 association compared to the others (OR = 2.93). Extensive data about the comparison  
263 between the characteristics of the two groups are available in table 2.

| Variable                           | Alone (%)   | Associated (%) | p      | OR (Alone/Ass)*    |
|------------------------------------|-------------|----------------|--------|--------------------|
| Geographical distribution          |             |                |        |                    |
| North-west                         | 883 (31.4)  | 610 (30.5)     | <0.001 | 0.90 (0.77 – 1.05) |
| North-east                         | 714 (25.4)  | 442 (22.1)     |        |                    |
| Centre                             | 618 (21.9)  | 586 (29.2)     |        |                    |
| South                              | 503 (17.9)  | 310 (15.5)     |        |                    |
| Islands                            | 96 (3.4)    | 54 (2.7)       |        |                    |
| Age                                |             |                |        |                    |
| 20-29                              | 527 (18.7)  | 518 (25.9)     | <0.001 | 0.79 (0.68 – 0.92) |
| 30-39                              | 1083 (38.5) | 845 (42.2)     |        |                    |
| 40-49                              | 699 (24.8)  | 420 (21.0)     |        |                    |
| 50-59                              | 395 (14.0)  | 201 (10.0)     |        |                    |
| 60-65                              | 94 (3.4)    | 18 (0.9)       |        |                    |
| >65                                | 16 (0.6)    | 0 (0.0)        |        |                    |
| Gender                             |             |                |        |                    |
| Male                               | 1999 (71.0) | 1215 (60.7)    | <0.001 | 1.59 (1.41 – 1.79) |
| Female                             | 815 (29.0)  | 787 (39.3)     |        |                    |
| Training                           |             |                |        |                    |
| T1                                 | 851 (30.2)  | 758 (37.9)     | <0.001 | 0.71 (0.63 – 0.80) |
| T2                                 | 1963 (69.8) | 1244 (62.1)    |        |                    |
| Work                               |             |                |        |                    |
| DO employed                        | 31 (1.1)    | 34 (1.7)       | <0.001 | 0.58 (0.36 – 0.95) |
| DO self-employed in own clinic     | 2511 (89.2) | 1600 (79.9)    |        |                    |
| DO self-employed not in own clinic | 272 (9.7)   | 368 (18.4)     |        |                    |
| Working Place                      |             |                |        |                    |
| Private practice                   | 2510 (92.1) | 1547 (77.3)    | <0.001 |                    |
| Clinic/hospital                    | 482 (17.1)  | 510 (25.5)     | <0.001 | 1.72 (1.49 – 1.97) |
| Osteopathy School                  | 557 (19.8)  | 495 (24.7)     | <0.001 | 1.44 (1.26 – 1.65) |
| University                         | 79 (2.8)    | 86 (4.3)       | 0.005  | 1.77 (1.29 – 2.41) |
| Other                              | 374 (13.3)  | 356 (17.8)     | <0.001 | 1.54 (1.32 – 1.81) |
| Patients/day                       |             |                |        |                    |
| 0-5                                | 1396 (49.6) | 867 (43.3)     | <0.001 | 1.28 (1.13 – 1.45) |
| <0.0016-10                         | 1142 (40.6) | 909 (45.4)     |        |                    |
| 11-15                              | 225 (8.0)   | 210 (10.5)     |        |                    |
| 16-20                              | 39 (1.4)    | 10 (0.5)       |        |                    |
| >20                                | 12 (0.4)    | 6 (0.3)        |        |                    |
|                                    |             |                |        |                    |
| Time/patient                       |             |                |        |                    |
| <30 minutes                        | 57 (2.0)    | 23 (1.2)       | <0.001 | 1.69 (1.02 – 2.81) |
| 30-45 minutes                      | 484 (17.2)  | 331 (16.5)     |        |                    |
| 46-60 minutes                      | 1651 (58.8) | 1338 (66.8)    |        |                    |
| >60 minutes                        | 622 (22.1)  | 310 (15.5)     |        |                    |
| Fee first consultation             |             |                |        |                    |
| <25 euros                          | 27 (1.0)    | 11 (0.6)       | <0.001 | 0.77 (0.33 – 1.80) |
| 26-30 euros                        | 73 (2.6)    | 23 (1.2)       |        |                    |
| 31-40 euros                        | 198 (7.0)   | 103 (5.2)      |        |                    |
| 41-50 euros                        | 907 (32.2)  | 574 (28.6)     |        |                    |
| 51-60 euros                        | 671 (23.8)  | 648 (32.4)     |        |                    |
| 61-70 euros                        | 405 (14.4)  | 352 (17.5)     |        |                    |
| 71-80 euros                        | 285 (10.1)  | 163 (8.1)      |        |                    |
| 81-90 euros                        | 113 (4.1)   | 61 (3.1)       |        |                    |
| 91-100 euros                       | 77 (2.7)    | 39 (1.9)       |        |                    |
| >100 euros                         | 58 (2.1)    | 28 (1.4)       |        |                    |
| Fee following consultations        |             |                |        |                    |
| <25 euros                          | 43 (1.5)    | 12 (0.60)      | <0.001 | 1.79 (0.87 – 3.70) |
| 26-30 euros                        | 100 (3.5)   | 50 (2.50)      |        |                    |
| 31-40 euros                        | 340 (12.1)  | 229 (11.4)     |        |                    |
| 41-50 euros                        | 944 (33.6)  | 673 (33.6)     |        |                    |
| 51-60 euros                        | 676 (24.0)  | 555 (27.8)     |        |                    |
| 61-70 euros                        | 370 (13.2)  | 292 (14.6)     |        |                    |
| 71-80 euros                        | 184 (6.6)   | 125 (6.3)      |        |                    |
| 81-90 euros                        | 59 (2.0)    | 38 (1.9)       |        |                    |
| 91-100 euros                       | 75 (2.7)    | 28 (1.4)       |        |                    |
| >100 euros                         | 23 (0.8)    | 0 (0.00)       |        |                    |
| Average waiting period             |             |                |        |                    |
| Same day                           | 69 (2.5)    | 20 (1.00)      | <0.001 | 2.51 (1.52 – 4.16) |
| Within 1 week                      | 1559 (55.4) | 1136 (56.7)    |        |                    |
| 1 week < X ≤ 2 weeks               | 827 (29.4)  | 612 (30.6)     |        |                    |
| 2 weeks < X ≤ 3 weeks              | 126 (4.5)   | 107 (5.3)      |        |                    |
| 3 weeks < X ≤ 4 weeks              | 97 (3.4)    | 62 (3.1)       |        |                    |
| > 4 weeks                          | 136 (4.8)   | 65 (3.3)       |        |                    |

264 Table 2. characteristics of the two groups (*alone vs associated*).

265 \*OR is computed for the probability of working alone using the first value of each variable as the exposure factor.

266

267 **PCA and logistic analysis**

268 The principal component analysis supported a ten-component model (Table 3), based on  
 269 eigenvalues included between 6.8 (PC-1) to 1.1 (PC-10). This model explained 80.5% of the  
 270 total variance and appeared interpretable and therefore was retained. Components emerging  
 271 from the analysis included all items referred to the 3 categories. Few items have found to  
 272 have loading values below -0.40, whereas a distinct number of items had values above 0.30  
 273 or below -0.30. Collectively items that correlated the most were those related to the category  
 274 clinical, i.e. time to patient and fees.

275 Following the PCA, the ten-components model was loaded into a logistic regression in order  
 276 to identify those components that associated significantly with the Alone/Associated  
 277 dependent variable.

278 As shown in Table 4, the logistic analysis demonstrated that only seven factors were  
 279 significantly related to being "alone". This result means that those components that resulted  
 280 significantly associated include items characterising the difference between being "alone or  
 281 associated" in practice. Among those, there is clear evidence that osteopaths working alone  
 282 have an increased probability (OR = 0.91; CI 95%: 0.88 - 0.94; p<0.01) of using systemic  
 283 diagnostic and treatment techniques (see PC-3 items in Table 3) and have distinct clinical  
 284 features with higher probability (OR =0.92; 0.88 - 0.96; p<0.01) of spending less time with  
 285 patients, being paid less but treating a higher number of patients per week (see PC-6 items in  
 286 Table 3).

|                             | PC1   | PC2          | PC3         | PC4          | PC5         | PC6          | PC7         | PC8          | PC9   | PC10         |
|-----------------------------|-------|--------------|-------------|--------------|-------------|--------------|-------------|--------------|-------|--------------|
| Region                      | 0.00  | -0.03        | <b>0.28</b> | <b>-0.20</b> | -0.08       | <b>-0.41</b> | 0.16        | <b>-0.35</b> | 0.01  | <b>0.30</b>  |
| Gender                      | 0.00  | -0.07        | <b>0.28</b> | -0.01        | 0.06        | -0.13        | <b>0.24</b> | -0.09        | 0.14  | <b>-0.29</b> |
| Age                         | 0.07  | <b>0.30</b>  | -0.19       | -0.13        | -0.12       | -0.07        | 0.01        | <b>0.30</b>  | 0.07  | -0.04        |
| Training_type               | -0.03 | <b>-0.23</b> | 0.13        | 0.07         | 0.12        | -0.12        | <b>0.22</b> | <b>-0.56</b> | -0.08 | -0.03        |
| Time for new patient        | 0.01  | -0.11        | <b>0.24</b> | 0.11         | <b>0.20</b> | <b>-0.44</b> | 0.05        | <b>0.22</b>  | 0.02  | <b>0.24</b>  |
| Time for returning patient  | 0.03  | -0.08        | <b>0.26</b> | 0.08         | <b>0.20</b> | <b>-0.40</b> | 0.02        | <b>0.25</b>  | 0.07  | <b>0.29</b>  |
| Fee first consultation      | -0.02 | <b>0.30</b>  | -0.14       | <b>-0.25</b> | 0.12        | <b>-0.35</b> | <b>0.20</b> | -0.06        | -0.11 | <b>-0.22</b> |
| Fee following consultation  | 0.00  | <b>0.29</b>  | -0.12       | <b>-0.31</b> | 0.16        | <b>-0.34</b> | 0.16        | -0.03        | -0.10 | <b>-0.24</b> |
| Average waiting period      | 0.01  | <b>0.24</b>  | -0.10       | -0.16        | 0.12        | 0.07         | <b>0.24</b> | -0.05        | 0.17  | <b>0.46</b>  |
| N patients per working week | -0.02 | <b>0.25</b>  | -0.18       | <b>-0.20</b> | 0.06        | <b>0.23</b>  | <b>0.21</b> | -0.11        | 0.07  | <b>0.32</b>  |

|                                                                                  |              |             |             |              |              |             |              |              |              |             |
|----------------------------------------------------------------------------------|--------------|-------------|-------------|--------------|--------------|-------------|--------------|--------------|--------------|-------------|
| Diagnostic techniques - assessment of visceral mobility                          | -0.16        | 0.11        | <b>0.27</b> | <b>-0.23</b> | -0.05        | -0.04       | <b>-0.28</b> | -0.14        | 0.11         | 0.04        |
| Diagnostic techniques - assessment of the cranium (neuro- and viscerocranium)    | -0.04        | <b>0.21</b> | <b>0.35</b> | -0.04        | 0.10         | 0.03        | -0.17        | -0.01        | -0.02        | -0.05       |
| Diagnostic techniques - fascial testing                                          | -0.11        | 0.17        | <b>0.28</b> | <b>-0.20</b> | -0.09        | 0.15        | -0.02        | 0.10         | 0.13         | -0.04       |
| Diagnostic techniques - inspection                                               | -0.12        | 0.10        | -0.05       | 0.02         | 0.04         | -0.02       | <b>-0.38</b> | -0.06        | <b>-0.23</b> | <b>0.21</b> |
| Diagnostic techniques - muscle function testing                                  | -0.16        | 0.18        | -0.07       | <b>0.29</b>  | 0.07         | -0.01       | -0.08        | -0.13        | -0.10        | 0.03        |
| Diagnostic techniques - neurolymphatic reflex tests                              | <b>-0.20</b> | -0.08       | -0.04       | <b>-0.24</b> | 0.04         | 0.02        | -0.11        | 0.03         | <b>-0.24</b> | -0.08       |
| Diagnostic techniques - palpation of position/structures                         | -0.05        | 0.14        | 0.09        | <b>0.20</b>  | <b>0.23</b>  | 0.13        | 0.11         | <b>0.20</b>  | <b>-0.38</b> | -0.04       |
| Diagnostic techniques - palpation of movement                                    | -0.19        | 0.13        | -0.06       | 0.17         | 0.01         | -0.12       | <b>-0.23</b> | 0.04         | 0.16         | 0.03        |
| Diagnostic techniques - percussion and auscultation                              | <b>-0.24</b> | -0.13       | -0.11       | 0.05         | -0.10        | -0.04       | 0.17         | 0.13         | <b>0.26</b>  | -0.09       |
| Diagnostic techniques - tender points and trigger points                         | <b>-0.24</b> | -0.12       | -0.11       | -0.07        | <b>0.39</b>  | 0.11        | -0.07        | 0.04         | 0.17         | 0.00        |
| Diagnostic techniques - classic orthopedic tests                                 | <b>-0.24</b> | -0.06       | -0.12       | -0.05        | <b>0.39</b>  | 0.04        | -0.09        | 0.02         | 0.18         | 0.00        |
| Diagnostic techniques - classic neurologic tests                                 | <b>-0.26</b> | -0.12       | -0.12       | 0.02         | <b>0.23</b>  | 0.10        | 0.00         | 0.11         | 0.10         | -0.06       |
| Diagnostic techniques - Range Of Motion (ROM)                                    | <b>-0.20</b> | -0.14       | -0.04       | -0.06        | <b>0.30</b>  | 0.13        | 0.00         | 0.06         | -0.09        | -0.01       |
| Diagnostic techniques - Otoscopy                                                 | -0.09        | 0.18        | -0.13       | <b>0.23</b>  | 0.00         | -0.12       | -0.13        | <b>-0.20</b> | 0.13         | -0.16       |
| Diagnostic techniques - urine test                                               | -0.05        | 0.13        | -0.13       | 0.12         | 0.04         | -0.13       | <b>-0.22</b> | -0.16        | <b>0.38</b>  | -0.19       |
| Treatment techniques - automatic shifting and fluid body approach                | 0.03         | <b>0.28</b> | 0.18        | <b>0.22</b>  | <b>0.22</b>  | 0.16        | 0.16         | -0.02        | -0.04        | 0.02        |
| Treatment techniques - fascial techniques                                        | -0.17        | 0.07        | <b>0.27</b> | -0.04        | -0.08        | <b>0.25</b> | 0.17         | -0.01        | 0.12         | -0.08       |
| Treatment techniques - fluid techniques                                          | -0.17        | 0.13        | 0.11        | 0.15         | -0.03        | 0.17        | <b>0.21</b>  | 0.15         | 0.06         | -0.04       |
| Treatment techniques - functional techniques                                     | -0.15        | 0.09        | 0.18        | 0.04         | 0.08         | 0.06        | 0.14         | -0.08        | -0.08        | -0.16       |
| Treatment techniques - GOT/TBA                                                   | <b>-0.23</b> | -0.07       | -0.04       | -0.02        | -0.12        | 0.01        | 0.09         | 0.03         | <b>-0.27</b> | -0.08       |
| Treatment techniques - HVLA                                                      | <b>-0.23</b> | -0.10       | -0.13       | -0.17        | -0.07        | -0.06       | -0.03        | -0.09        | <b>-0.27</b> | 0.09        |
| Treatment techniques - MET                                                       | <b>-0.22</b> | -0.12       | -0.04       | -0.05        | -0.10        | -0.10       | -0.02        | <b>0.22</b>  | -0.15        | -0.10       |
| Treatment techniques - neurocranial and viscerocranial techniques                | -0.16        | 0.12        | <b>0.22</b> | -0.02        | -0.07        | 0.00        | -0.08        | -0.01        | -0.11        | -0.03       |
| Treatment techniques - neurovisceral and neurolymphatic reflex techniques        | -0.17        | <b>0.20</b> | -0.04       | <b>0.33</b>  | -0.13        | -0.04       | 0.02         | -0.03        | -0.10        | -0.06       |
| Treatment techniques - percussion and vibration techniques                       | -0.18        | 0.15        | 0.00        | 0.12         | <b>-0.22</b> | -0.09       | -0.05        | <b>0.21</b>  | 0.01         | 0.06        |
| Treatment techniques - trigger points                                            | <b>-0.23</b> | -0.13       | -0.08       | 0.02         | <b>-0.22</b> | -0.07       | <b>0.27</b>  | 0.09         | <b>0.21</b>  | -0.04       |
| Treatment techniques - Progressive Inhibition of Neuromuscular Structures (PINS) | <b>-0.20</b> | 0.05        | -0.05       | 0.16         | -0.12        | -0.14       | 0.16         | 0.00         | -0.09        | 0.16        |
| Treatment techniques - soft and connective tissue techniques                     | <b>-0.21</b> | -0.09       | 0.10        | -0.12        | -0.18        | -0.06       | 0.12         | -0.02        | 0.01         | 0.18        |
| Treatment techniques - visceral manipulations                                    | <b>-0.20</b> | 0.01        | <b>0.22</b> | <b>-0.25</b> | -0.16        | -0.06       | -0.16        | -0.15        | 0.08         | 0.10        |
| Treatment techniques - toggle-techniques                                         | -0.16        | 0.03        | -0.08       | 0.12         | -0.10        | -0.13       | 0.13         | <b>-0.33</b> | -0.04        | <b>0.29</b> |

Factor loadings above 0.20 (positive or negative) are in bold  
Table 3. Principal-Component Analysis results

| Coefficients | Estimated | Std. Error | z value | Pr(> z )        | OR   | 95% CI      |
|--------------|-----------|------------|---------|-----------------|------|-------------|
| (intercept)  | 0.35      | 0.03       | 11.84   | <b>&lt;0.01</b> | 1.42 | 1.34 - 1.51 |
| PC1          | 0.07      | 0.01       | 6.39    | <b>&lt;0.01</b> | 1.08 | 1.05 - 1.10 |
| PC2          | 0.01      | 0.02       | 0.98    | 0.33            | 1.02 | 0.99 - 1.05 |
| PC3          | -0.10     | 0.02       | -5.72   | <b>&lt;0.01</b> | 0.91 | 0.88 - 0.94 |
| PC4          | 0.03      | 0.02       | 1.22    | 0.22            | 1.03 | 0.98 - 1.07 |
| PC5          | -0.03     | 0.02       | -1.24   | 0.21            | 0.97 | 0.93 - 1.02 |
| PC6          | -0.09     | 0.02       | -3.51   | <b>&lt;0.01</b> | 0.92 | 0.88 - 0.96 |
| PC7          | -0.12     | 0.03       | -4.60   | <b>&lt;0.01</b> | 0.89 | 0.84 - 0.93 |
| PC8          | 0.13      | 0.03       | 4.91    | <b>&lt;0.01</b> | 1.14 | 1.08 - 1.21 |
| PC9          | 0.07      | 0.03       | 2.47    | <b>0.01</b>     | 1.07 | 1.02 - 1.14 |
| PC10         | 0.09      | 0.03       | 2.97    | <b>&lt;0.01</b> | 1.09 | 1.03 - 1.16 |

Table 4. Logistic Analysis of the principal components

287  
288  
289

290  
291

292 **Patients characteristics**

293 The most represented age groups treated within a six months period prior to the census were  
294 41-64 years old (n=4452; 92.4%) and 21-40 years old (n=4291; 89.1%). Similarly, the most  
295 reported new patients age groups were 41-64 years old (n=4221; 87.7%) and 21-40 years old  
296 (n=3364; 69.9%). Respondents reported that the majority of their patients were self-referred,  
297 whether this was based on advice from other patients or acquaintances. The most common  
298 body regions requiring osteopathic care were the cervical and lumbar spine. The most  
299 common presenting complaints were back pain, cervical pain, cervicobrachialgia, sciatica,  
300 shoulder pain, and headaches. The majority of respondents indicated to have no preference of  
301 specific patients groups to work with (e.g., paediatrics, athletes, artists) (n=4106; 85.26%).  
302

### 303 Discussion

304 The variables studied are part of the OPERA questionnaire, which evaluates the  
305 characteristics of the osteopathic population in a representative national sample. After an  
306 initial evaluation of their distribution (2), the scores were modulated with a statistical analysis  
307 procedure, in order to further identify the profile of the osteopathic practitioner with peculiar  
308 characteristics (components), which allowed better defining the profiles of the studied  
309 population.

310 The OPERA-IT was the first national census relevant to osteopathy in Italy. Data provided  
311 by the participants might represent critical new findings relating to osteopathic practice and  
312 patients characteristics that have not been observed through other national healthcare data  
313 sets (e.g. *Istituto Nazionale di Statistica, Istituto Superiore di Sanità*). The results of this  
314 study provide a comparison between the osteopathic professionals who work alone and those  
315 who work in association with other professionals to highlight possible differences in terms of  
316 geographical distribution, age, gender, type of training, working place and modalities,  
317 patients per day, time of the treatment, fees, and average waiting period for booking an

318 appointment. Moreover, it describes patients' characteristics in terms of age, referring  
319 modalities. Our results highlighted two different profiles between osteopaths who work alone  
320 and those who work associated with other professionals. The former have an increased  
321 probability of the 8% (PC-1;  $p < 0.01$ ) to not deliver musculoskeletal related diagnostic and  
322 treatment techniques, in particular, tender and trigger points assessment, orthopaedic tests,  
323 neurologic tests, range of motion tests, General Osteopathic Treatment (GOT), High Velocity  
324 and Low Amplitude techniques (HVLA), Muscle Energy Techniques (MET) (table 3).  
325 Moreover, osteopaths who work alone are 9% more likely (PC-3;  $p < 0.01$ ) to perform  
326 systemic diagnostic and treatment techniques such as the assessment of visceral mobility,  
327 cranium assessment, fascial testing, and cranial and visceral manipulations (table 3).  
328 Osteopaths who work in association with other professionals have a higher probability (PC-6;  
329 8%;  $p < 0.01$ ) to have a short duration of the treatment and low treatment fees and to have  
330 more average patients per week (table 3).

331 Emerging evidence on the added value of effective interprofessional healthcare teams has  
332 created new perspectives on interprofessional collaboration (24–26).

333 The interprofessional practice has been described as a process that can affect three domains in  
334 healthcare; namely, enhancing patient experience with treatment, improving population  
335 health and decreasing healthcare costs per capita (27).

336 Capacity shortages, an ageing population with numerous chronic conditions and new  
337 scientific discoveries, require the cooperation of both clinicians and non-clinical members of  
338 the healthcare team (28,29).

339 Contemporary healthcare strategies accept interprofessional practice as an irremissible  
340 method to address complex issues. While interprofessional cooperation is beneficial to both  
341 practitioners and patients (30), it is still not fully in place (31). Whitehead (32) identified  
342 several advantages in applying interprofessional practice for the management of complex

343 conditions. The author argued that interprofessional practice creates an environment in which  
344 the group exceeds the parts' number; common goals are set, and everyone is working towards  
345 common goals; the chance to discuss with peers highlights the strengths and weaknesses of  
346 the working group through the exchange of experiences and knowledge. This helps break  
347 down distrust walls and reduces rivalry. Hierarchies become flatter and more accessible.  
348 Moreover, various professional experiences offer the possibility of innovative and creative  
349 activities and to identify gaps in practice; partnerships and partnerships result in a more  
350 productive way to distribute and use resources effectively; patients can see a more positive,  
351 focused and coordinated approach to their health needs and have more faith in it. Finally,  
352 there is a higher likelihood of more intensive and holistic approach, which is particularly  
353 relevant to the osteopathic practice. Whitehead (32) also highlighted different disadvantages  
354 of not engaging in interprofessional practice. The author stated that lone practitioners often  
355 act in an individualistic way. This means that weaknesses and mistakes are not solved, and  
356 probably they are perpetuated, there is no acknowledgement of good practice, and there are  
357 no opportunities to enhance practice. Environments are competitive in a destructive way, the  
358 hierarchies are strict, and the position of power is held through manipulative and aggressive  
359 behaviour. Perspectives and attitudes are kept isolated and limited. This suppresses the  
360 dissemination of information and ideas, fostering a practitioner centred practice. In lone  
361 practice, professional groups are protective, guarded, and mistrustful, and this may lead to  
362 professional disputes (33). The competitive climate fosters fights for resources. This might  
363 lead to a less efficient and less successful practice (32). Moreover, the author argues that in  
364 lone practice, there is a greater likelihood of clinical, reductionist, and mechanistic treatment  
365 being provided, particularly in terms of health services.

366

367 Our findings confirmed a well-established trend among other relevant surveys (5,6,8,15–  
368 17,19) showing that primary reasons for osteopathic consultation are musculoskeletal  
369 disorders mostly related to the spine. 

370 In general, although the scope of practice of osteopathic profession might be influenced by  
371 the regulation status, professional profile, and cultural factors related to the country, our study  
372 found several similarities with the other European and international surveys. Our findings  
373 supported some of the already known trends about the scope of practice of osteopathy,   
374 helping to strengthen what might start to be considered an international shared descriptive  
375 framework of the profession.

376 Results from OPERA-IT might help to define the profile of osteopathic professionals through  
377 the perspective of Italian osteopaths. This could be of use in supporting the regulation process  
378 providing materials for constructive and informed discussions with policymakers and other  
379 stakeholders. Current data might be used to tailor regulatory strategies based on policy  
380 outcomes. Moreover, professional associations and registers may benefit from present study   
381 data in terms of understanding of the working modalities of their associates and to monitor  
382 the national trends of the primary reasons for the osteopathic consultation. Lastly, there are  
383 advantages for osteopathic practitioners: to be able to tailor their continuous professional  
384 development to the needs of the Italian population and to assess their practice is up to date  
385 with the current trend of the profession on the national ground.

386

### 387 **Strengths and weaknesses of this study**

388 To the best of our knowledge, this study is the first to highlight the differences between the  
389 clinical profile of osteopathic practitioners who work alone and those who work in  
390 association with other professionals in Italy. However, this study showed estimates that might  
391 not be completely representative of the osteopathic Italian population. Moreover, self-



392 reporting data might be influenced by response bias. Furthermore, data reported is from a  
393 nation-wide survey and thus might not be generalisable to other socio-cultural contexts.

394

### 395 **Conclusions**

396 Osteopathic practice in Italy seems to be characterised by interprofessional collaboration,  
397 mostly with physiotherapists. Our results highlighted two different profiles in terms of  
398 sociodemographic characteristics and work modalities between osteopaths who work alone  
399 and those who work associated with other professionals. Although according to the  
400 respondents, people of all ages consult Italian osteopaths, the majority of patients are adults.  
401 Most of them have been referred to osteopathy by other patients or acquaintances. Patients  
402 seek osteopathic care mostly for musculoskeletal related complaints.

403 The findings of the present study provide valuable insights into the osteopathic profession in  
404 Italy, which might be taken into consideration during the regulation process about the  
405 professional profile of competencies of the osteopathic profession in Italy. Follow-up studies  
406 have been planned to track future changes within the osteopathic profession.

407

### 408 **Acknowledgments**

409 The authors sincerely thank Prof. Angelo Manfredi and Prof. Fabrizio Consorti for their help  
410 in reviewing the paper. The OPERA-IT group is composed by: Marcello Luca Marasco  
411 (ABEos), Alberto Maggiani (AIMO), Antonio Cavallaro (AISERCO), Dario Silvestri  
412 (ASOMI), Joseph Zurlo and Marco Petracca (CERDO), Mauro Fornari (CIO), Alessandro  
413 Rapisarda (CSDOI), Giacomo Lo Voi (CSOT), Liria Papa (ICOM), Sandro Tamagnini  
414 (ICOMM), Roberta Filipazzi (IEMO), Tatiana Stirpe (Meta Osteopatia), Saverio Colonna  
415 (OSCE), Alessandro Gavazzi (SOFI), Andrea Manzotti and Andrea Bergna (SOMA),  
416 Sbarbaro Marco (SSOI), Federico Franscini (APO), Guglielmo Donnaquio (Osteopatia per

417 Bambini), Alessandro Parisi (SIOS), Massimo Valente (Tuttosteopatia), Emanuele Botti  
418 (Advanced Osteopathy), osteopatiriconosciuti.

419

## 420 **Author Contributions**

421 **Conceptualization:** Francesco Cerritelli, Patrick L. S. van Dun, Jorge E. Esteves, Paola  
422 Sciomachen, Eleonora Lacorte, Nicola Vanacore.

423 **Data curation:** Francesco Cerritelli, Giacomo Consorti.

424 **Formal analysis:** Francesco Cerritelli, Jorge E. Esteves, Giacomo Consorti.

425 **Funding acquisition:** Francesco Cerritelli.

426 **Investigation:** Francesco Cerritelli, Patrick L. S. van Dun, Jorge E. Esteves.

427 **Methodology:** Francesco Cerritelli, Patrick L. S. van Dun, Jorge E. Esteves, Giacomo  
428 Consorti, Paola Sciomachen, Eleonora Lacorte, Nicola Vanacore.

429 **Project administration:** Francesco Cerritelli, Patrick L. S. van Dun, Jorge E. Esteves,  
430 Eleonora Lacorte.

431 **Resources:** Francesco Cerritelli, Massimo Valente

432 **Software:** Francesco Cerritelli, Massimo Valente

433 **Supervision:** Francesco Cerritelli, Patrick L. S. van Dun, Jorge E. Esteves, Paola  
434 Sciomachen, Eleonora Lacorte, Nicola Vanacore, Massimo Valente

435 **Validation:** Francesco Cerritelli, Patrick L. S. van Dun, Jorge E. Esteves, Nicola Vanacore.

436 **Visualization:** Francesco Cerritelli, Jorge E. Esteves, Giacomo Consorti.

437 **Writing – original draft:** Francesco Cerritelli, Patrick L. S. van Dun, Jorge E. Esteves,  
438 Giacomo Consorti.

439 **Writing – review & editing:** Francesco Cerritelli, Patrick L. S. van Dun, Jorge E. Esteves,  
440 Giacomo Consorti, Eleonora Lacorte, Nicola Vanacore.

441

442

443

444 **References**

- 445 1. Eumetra Monterosa. L'opinione degli italiani sull'osteopatia. 2017.
- 446 2. Cerritelli F, van Dun PLS, Esteves JE, Consorti G, Sciomachen P, Lacorte E, et al.  
447 The Italian Osteopathic Practitioners Estimates and RATES (OPERA) study: A cross  
448 sectional survey. PloS one [Internet]. 2019 [cited 2019 Dec 20];14(1):e0211353.  
449 Available from: <http://www.ncbi.nlm.nih.gov/pubmed/30682169>
- 450 3. GOsC. Results – snapshot survey 2001. London; 2001.
- 451 4. KPMG. Report A: how do osteopaths practice? Zurich; 2011.
- 452 5. Burke SR, Myers R, Zhang AL. A profile of osteopathic practice in Australia 2010-  
453 2011: a cross sectional survey. BMC musculoskeletal disorders [Internet]. 2013 Aug 1  
454 [cited 2019 Dec 20];14:227. Available from:  
455 <http://www.ncbi.nlm.nih.gov/pubmed/23915239>
- 456 6. Dun P van, Nicolaie M, of AVM-IJ, 2016 undefined. State of affairs of osteopathy in  
457 the Benelux: Benelux Osteosurvey 2013. Elsevier [Internet]. [cited 2019 Dec 20];  
458 Available from: <https://www.sciencedirect.com/science/article/pii/S1746068916000043>
- 459 7. CIULLA L, FOUCART J, LEPERS Y, CULLUS P. Enquête d'opinions sur la  
460 perception de l'ostéopathie au sein de la population belge francophone.  
461 mainslibres.ch [Internet]. [cited 2019 Dec 20]; Available from:  
462 [http://www.mainslibres.ch/pdf/sommaire2016Resumes/sommaire\\_3\\_2016/resume\\_ciulla.pdf](http://www.mainslibres.ch/pdf/sommaire2016Resumes/sommaire_3_2016/resume_ciulla.pdf)
- 463
- 464 8. Alvarez Bustins G, López Plaza P-V, Carvajal SR. Profile of osteopathic practice in  
465 Spain: results from a standardized data collection study. BMC complementary and  
466 alternative medicine [Internet]. 2018 Apr 11 [cited 2019 Dec 20];18(1):129. Available  
467 from: <http://www.ncbi.nlm.nih.gov/pubmed/29642901>

- 468 9. Vaucher P, Macdonald RJD, Carnes D. The role of osteopathy in the Swiss primary  
469 health care system: A practice review. Vol. 8, *BMJ Open*. BMJ Publishing Group;  
470 2018.
- 471 10. Carreiro J FC. *Foundations of Osteopathic Medicine*. Third. Chila A editor, editor.  
472 Philadelphia: Wolters Kluwer/Lippincott Williams & Wilkins; 2011. 46–52.
- 473 11. Forum for Osteopathic Regulation in Europe (FORE). *Regulation*. 2018.
- 474 12. Senate of Republic of Italy. Law 3/2018. Rome: Senate of Republic of Italy ; 2018.
- 475 13. Sciomachen P, ... CA-I, 2018 undefined. Core competencies in osteopathy: Italian  
476 register of osteopaths proposal. *journalofosteopathicmedicine.com* [Internet]. [cited  
477 2019 Dec 20]; Available from:  
478 [https://www.journalofosteopathicmedicine.com/article/S1746-0689\(18\)30035-](https://www.journalofosteopathicmedicine.com/article/S1746-0689(18)30035-)  
479 [X/abstract](https://www.journalofosteopathicmedicine.com/article/S1746-0689(18)30035-X/abstract)
- 480 14. Johnson SM, Kurtz ME. Conditions and diagnoses for which osteopathic primary  
481 care physicians and specialists use osteopathic manipulative treatment. *Journal of the*  
482 *American Osteopathic Association*. 2002;102(10):527–40.
- 483 15. Sibbritt D, Adams J, Young AF. A profile of middle-aged women who consult a  
484 chiropractor or osteopath: findings from a survey of 11,143 Australian women. *Journal*  
485 *of manipulative and physiological therapeutics* [Internet]. 2006 Jun [cited 2019 Dec  
486 20];29(5):349–53. Available from: <http://www.ncbi.nlm.nih.gov/pubmed/16762661>
- 487 16. Snider KT, Snider EJ, DeGooyer BR, Bukowski AM, Fleming RK, Johnson JC.  
488 Retrospective medical record review of an osteopathic manipulative medicine hospital  
489 consultation service. *The Journal of the American Osteopathic Association* [Internet].  
490 2013 Oct [cited 2019 Dec 20];113(10):754–67. Available from:  
491 <http://www.ncbi.nlm.nih.gov/pubmed/24084802>
- 492 17. Fawkes CA, Leach CMJ, Mathias S, Moore AP. A profile of osteopathic care in  
493 private practices in the United Kingdom: A national pilot using standardised data  
494 collection. *Manual Therapy*. 2014;19(2):125–30.

- 495 18. Morin C, Aubin A. Primary reasons for osteopathic consultation: A prospective  
496 survey in Quebec. Vol. 9, PLoS ONE. Public Library of Science; 2014.
- 497 19. Channell MK, Wang Y, McLaughlin MH, Ciesielski J, Pomerantz SC. Osteopathic  
498 Manipulative Treatment for Older Patients: A National Survey of Osteopathic  
499 Physicians. The Journal of the American Osteopathic Association [Internet]. 2016 Mar  
500 [cited 2019 Dec 20];116(3):136–43. Available from:  
501 <http://www.ncbi.nlm.nih.gov/pubmed/26927907>
- 502 20. Adams J, Sibbritt D, Steel A, Peng W. A workforce survey of Australian osteopathy:  
503 analysis of a nationally-representative sample of osteopaths from the Osteopathy  
504 Research and Innovation Network (ORION) project. BMC health services research  
505 [Internet]. 2018 [cited 2019 Dec 20];18(1):352. Available from:  
506 <http://www.ncbi.nlm.nih.gov/pubmed/29747647>
- 507 21. Rosen MA, DiazGranados D, Dietz AS, Benishek LE, Thompson D, Pronovost PJ, et  
508 al. Teamwork in healthcare: Key discoveries enabling safer, high-quality care. The  
509 American psychologist [Internet]. [cited 2019 Dec 20];73(4):433–50. Available from:  
510 <http://www.ncbi.nlm.nih.gov/pubmed/29792459>
- 511 22. Bennett C, Khangura S, Brehaut JC, Graham ID, Moher D, Potter BK, et al.  
512 Reporting guidelines for survey research: An analysis of published guidance and  
513 reporting practices. Vol. 8, PLoS Medicine. 2011.
- 514 23. Giusti R. Glossary of Osteopathic Terminology. Third. American association of  
515 colleges of osteopathic medicine, editor. American association of colleges of  
516 osteopathic medicine; 2017. 15.
- 517 24. (US) I of M. Educating for the Health Team: Report of the Conference on the  
518 Interrelationships of Educational Programs for Health Professionals, October 2-3,  
519 1972. 1972 [cited 2019 Dec 20]; Available from:  
520 [https://books.google.com/books?hl=it&lr=&id=8GArAAAAYAAJ&oi=fnd&pg=PP10&dq=%E2%97%8F%09Institute+of+Medicine.+\(1972\).+Educating+for+the+health+team.+](https://books.google.com/books?hl=it&lr=&id=8GArAAAAYAAJ&oi=fnd&pg=PP10&dq=%E2%97%8F%09Institute+of+Medicine.+(1972).+Educating+for+the+health+team.+)  
521

- 522 Washington,+DC:+National+Academy+of+Sciences&ots=BXtJVenum7&sig=dtHtWQ  
523 mQE6CFmWDOg5ri8J4iF1Q
- 524 25. Institute of Medicine Committee on the Health Professions Education. The core  
525 competencies needed for health care professionals. In: A. C. Greiner & E. Knebel  
526 (Eds.), editor. Health professions education: A bridge to quality. Washington, DC:  
527 Washington, DC: National Academies Press.; 2003. p. 45–73.
- 528 26. World Health Organization. Framework for action on interprofessional education and  
529 collaborative practice. Geneva, Switzerland; 2010.
- 530 27. Berwick DM, Nolan TW, Whittington J. The triple aim: Care, health, and cost. Vol.  
531 27, Health Affairs. 2008. p. 759–69.
- 532 28. Interprofessional Education Collaborative (2011). Core Competencies for  
533 Interprofessional Collaborative Practice [Internet]. 2011 [cited 2019 Nov 10]. Available  
534 from: [https://www.aacom.org/docs/default-source/insideome/ccrpt05-10-](https://www.aacom.org/docs/default-source/insideome/ccrpt05-10-11.pdf?sfvrsn=77937f97_2)  
535 [11.pdf?sfvrsn=77937f97\\_2](https://www.aacom.org/docs/default-source/insideome/ccrpt05-10-11.pdf?sfvrsn=77937f97_2)
- 536 29. Nandan M, Scott P. An innovative interprofessional education model to engage  
537 community and nonclinical participants. Journal of interprofessional care [Internet].  
538 2014 Jul [cited 2019 Dec 20];28(4):376–8. Available from:  
539 <http://www.ncbi.nlm.nih.gov/pubmed/24617846>
- 540 30. Miccolo MA, Spanier AH. Critical care management in the 1990s. Making  
541 collaborative practice work. Critical care clinics [Internet]. 1993 Jul [cited 2019 Dec  
542 20];9(3):443–53. Available from: <http://www.ncbi.nlm.nih.gov/pubmed/8353783>
- 543 31. Hojat M, Fields SK, Veloski JJ, Griffiths M, Cohen MJM, Plumb JD. Psychometric  
544 properties of an attitude scale measuring physician-nurse collaboration. Evaluation  
545 and the Health Professions. 1999 Jun;22(2):208–20.
- 546 32. Whitehead D. Applying collaborative practice to health promotion. Vol. 15, Nursing  
547 standard (Royal College of Nursing (Great Britain) : 1987). 2001. p. 33–7.

548 33. King O, Nancarrow SA, Borthwick AM, Grace S. Contested professional role  
549 boundaries in health care: A systematic review of the literature. *Journal of Foot and*  
550 *Ankle Research*. 2015 Feb 5;8(1).  
551



Click here to access/download  
**Supporting Information**  
supplementary material.docx



Supplement: pone.0235539.s002.pdf [file pone.0235539.s002.pdf]
